# Supplementary material for: Complexes of Glucarolactones with Water-Soluble Copolymers of N-Vinylpyrrolidone with N-Vinylamine as Inhibitors of β-Glucuronidase Efficacy
Source: MDPI journal article supplement (doi:10.3390/polym14010105), 2021-12-28
Supplement: s1 [file s1]

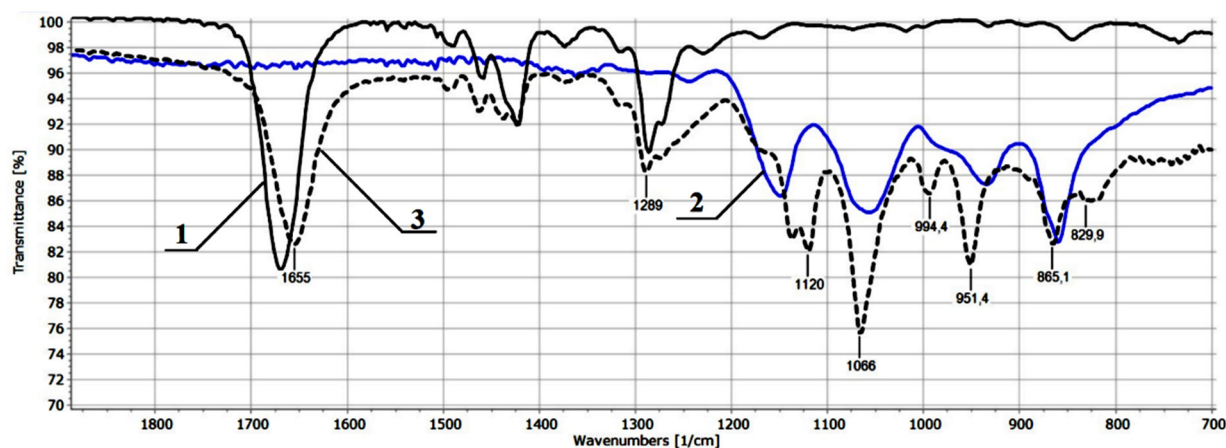

**Figure 1.** IR spectra of copolymer  $[N-VP]_n-[N-BA]_m$  (1), equimolar mixture of  $Na_2HPO_4$  and  $NaH_2PO_4$  (2), mixture of the copolymer with sodium phosphates (3).

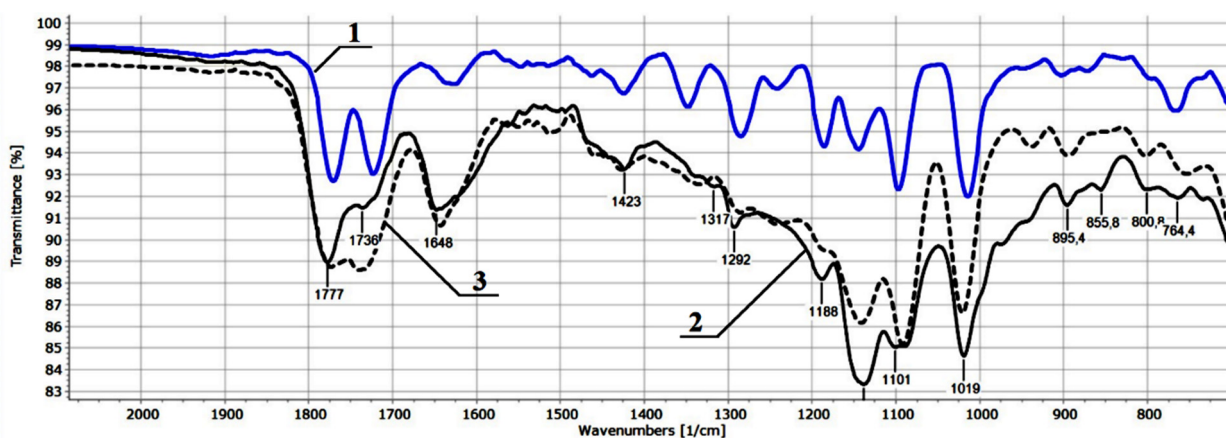

**Figure 2.** IR spectra of 1,4-GL (1), complex  $[N-VP]_n-[N-VA]_m$  [1,4- and 6,3-GL] (2), Preparation without added sodium phosphates (3).
